# Supplementary material for: Association of attrition with mortality: Findings from 11 waves over three decades of the Whitehall II study
Source: PubMed Central journal article supplement (PMC8071845; doi:10.1136/jech-2019-213175), 2020-06-25
Supplement: NIHMS1692543-supplement-Supplementary_File.pdf [file NIHMS1692543-supplement-Supplementary_File.pdf]

**Table S1. Association of attrition status at each wave with CVD and Non-CVD mortality up to the subsequent wave. (Analysis 1)**

| Wave                         | Response status         | No. alive | CVD mortality |                           | Non-CVD mortality |                           |
|------------------------------|-------------------------|-----------|---------------|---------------------------|-------------------|---------------------------|
|                              |                         |           | No. deaths    | SHR (95% CI) <sup>a</sup> | No. deaths        | SHR (95% CI) <sup>a</sup> |
| 1                            | Responders              | 10 012    | 12            | -                         | 29                | -                         |
| 2                            | Responders              | 8024      | 12            | <i>ref.</i>               | 35                | <i>ref.</i>               |
|                              | Withdrawal/Non-response | 1947      | 9             | 3.39 (1.35-8.53)          | 18                | 2.18 (1.24-3.84)          |
| 3                            | Responders              | 8647      | 20            | <i>ref.</i>               | 38                | <i>ref.</i>               |
|                              | Withdrawal/Non-response | 1250      | 3             | 1.30 (0.38-4.40)          | 5                 | 0.89 (0.35-2.26)          |
| 4                            | Responders              | 8462      | 25            | <i>ref.</i>               | 57                | <i>ref.</i>               |
|                              | Withdrawal/Non-response | 1369      | 9             | 2.38 (1.11-5.11)          | 15                | 1.53 (0.85-2.73)          |
| 5                            | Responders              | 7723      | 23            | <i>ref.</i>               | 51                | <i>ref.</i>               |
|                              | Withdrawal/Non-response | 2002      | 9             | 1.65 (0.75-3.63)          | 24                | 1.86 (1.14-3.04)          |
| 6                            | Responders              | 7231      | 28            | <i>ref.</i>               | 69                | <i>ref.</i>               |
|                              | Withdrawal/Non-response | 2387      | 15            | 1.59 (0.84-3.01)          | 41                | 1.77 (1.21-2.61)          |
| 7                            | Responders              | 6855      | 27            | <i>ref.</i>               | 77                | <i>ref.</i>               |
|                              | Withdrawal/Non-response | 2610      | 22            | 2.29 (1.29-4.07)          | 62                | 2.00 (1.43-2.80)          |
| 8                            | Responders              | 7054      | 28            | <i>ref.</i>               | 92                | <i>ref.</i>               |
|                              | Withdrawal/Non-response | 2223      | 16            | 1.74 (0.95-3.18)          | 38                | 1.27 (0.87-1.85)          |
| 9                            | Responders              | 6655      | 73            | <i>ref.</i>               | 183               | <i>ref.</i>               |
|                              | Withdrawal/Non-response | 2448      | 55            | 1.99 (1.40-2.84)          | 133               | 1.88 (1.51-2.34)          |
| 11                           | Responders              | 6213      | 43            | <i>ref.</i>               | 178               | <i>ref.</i>               |
|                              | Withdrawal/Non-response | 2446      | 36            | 1.84 (1.15-2.93)          | 112               | 1.47 (1.17-1.85)          |
| 12 <sup>b</sup>              | Responders              | 5551      | 21            | <i>ref.</i>               | 64                | <i>ref.</i>               |
|                              | Withdrawal/Non-response | 2739      | 9             | 0.84 (0.38-1.86)          | 46                | 1.27 (0.86-1.86)          |
| <i>P-value for linearity</i> |                         |           |               | <i>P=0.11</i>             | <i>P=0.61</i>     |                           |

<sup>a</sup> Adjusted for sex and age

<sup>b</sup> Mortality follow-up from wave 12 is up to August 2017

**Table S2. Sub-distribution hazard ratios (SHRs) of CVD and Non-CVD mortality from wave 1 to August 2017, by attrition status<sup>a</sup> in 10 012 participants (person years as time-scale)**

| Outcome                  | Attrition status        | No. deaths | SHR (95% CI)        |             |                                |
|--------------------------|-------------------------|------------|---------------------|-------------|--------------------------------|
|                          |                         |            | <i>Adjusted for</i> |             | <i>All factors<sup>b</sup></i> |
|                          |                         |            | <i>Sex and Age</i>  |             |                                |
| <b>CVD mortality</b>     |                         | 495        |                     |             |                                |
|                          | Response                | 312        |                     | <i>ref.</i> | <i>ref.</i>                    |
|                          | Withdrawal/Non-response | 183        | 1.76                | (1.45-2.13) | 1.46 (1.20-1.79)               |
| <b>Non-CVD mortality</b> |                         | 1367       |                     |             |                                |
|                          | Response                | 873        |                     | <i>ref.</i> | <i>ref.</i>                    |
|                          | Withdrawal/Non-response | 494        | 1.54                | (1.38-1.73) | 1.48 (1.32-1.67)               |

<sup>a</sup> Attrition status is time dependent and varies at each wave of the study

<sup>b</sup> Adjusted for sex, age, ethnicity, marital status, employment grade, smoking habit, alcohol drinking, and physical activity

**Table S3. Sub-distribution hazard ratios (SHRs) and 95% confidence interval (CIs) of CVD and non-CVD mortality by response status from wave 4 to August 2017 in 8791 participants (Analysis 2)**

| Outcome                  | Response status | No. Deaths | SHR (95% CI) |                              |                                                                        |                              |                                     |                              |      |             |
|--------------------------|-----------------|------------|--------------|------------------------------|------------------------------------------------------------------------|------------------------------|-------------------------------------|------------------------------|------|-------------|
|                          |                 |            | Sex and Age  |                              | Adjusted for<br>+Demography and<br>health risk behaviours <sup>b</sup> |                              | +General health status <sup>c</sup> |                              |      |             |
|                          |                 |            |              | <i>p</i> -value <sup>a</sup> |                                                                        | <i>p</i> -value <sup>a</sup> |                                     | <i>p</i> -value <sup>a</sup> |      |             |
| <b>CVD mortality</b>     |                 | 353        |              |                              |                                                                        |                              |                                     |                              |      |             |
|                          | Response        | 258        |              | <i>ref.</i>                  |                                                                        | <i>ref.</i>                  |                                     | <i>ref.</i>                  |      |             |
|                          | Withdrawal      | 33         | 1.28         | (0.89-1.84)                  | 0.102                                                                  | 1.14                         | (0.79-1.65)                         | 0.218                        | 1.21 | (0.84-1.75) |
|                          | Non-response    | 62         | 1.82         | (1.37-2.41)                  |                                                                        | 1.49                         | (1.10-2.01)                         |                              | 1.53 | (1.13-2.06) |
| <b>Non-CVD mortality</b> |                 | 1056       |              |                              |                                                                        |                              |                                     |                              |      |             |
|                          | Response        | 748        |              | <i>ref.</i>                  |                                                                        | <i>ref.</i>                  |                                     | <i>ref.</i>                  |      |             |
|                          | Withdrawal      | 136        | 1.75         | (1.46-2.11)                  | 0.617                                                                  | 1.72                         | (1.43-2.08)                         | 0.593                        | 1.77 | (1.47-2.13) |
|                          | Non-response    | 172        | 1.65         | (1.40-1.95)                  |                                                                        | 1.62                         | (1.36-1.92)                         |                              | 1.59 | (1.34-1.89) |

<sup>a</sup> P-value of Likelihood Ratio Test between the model with attrition status (response and withdrawal/non-response) and response status (response, withdrawal, non-response)

<sup>b</sup> Additionally adjusted for ethnicity, marital status, employment grade, smoking habit, alcohol drinking, and physical activity

<sup>c</sup> Additionally adjusted for PCS and MCS from each wave

**Table S4. SHRs and 95% CIs of CVD mortality in three models (Analysis 2)**

|                    | n=8791 | <i>Adjusted for</i> |              |                                    |              |                 |             |
|--------------------|--------|---------------------|--------------|------------------------------------|--------------|-----------------|-------------|
|                    |        | Sex and age         |              | + Demography and health behaviours |              | + Health status |             |
|                    |        | SHR                 | 95% CI       | SHR                                | 95% CI       | SHR             | 95% CI      |
| Response status    |        |                     |              |                                    |              |                 |             |
| Response           |        |                     | <i>ref.</i>  |                                    | <i>ref.</i>  |                 | <i>ref.</i> |
| Withdrawal         |        | 1.28                | (0.89-1.84)  | 1.14                               | (0.79-1.65)  | 1.21            | (0.84-1.75) |
| Non-response       |        | 1.82                | (1.37-2.41)  | 1.49                               | (1.10-2.01)  | 1.53            | (1.13-2.06) |
| Sex                |        |                     |              |                                    |              |                 |             |
| Men                |        |                     | <i>ref.</i>  |                                    | <i>ref.</i>  |                 | <i>ref.</i> |
| Women              |        | 0.78                | (0.62-0.98)  | 0.57                               | (0.43-0.75)  | 0.54            | (0.40-0.71) |
| Age in years       |        |                     |              |                                    |              |                 |             |
| 39 and below       |        |                     | <i>ref.</i>  |                                    | <i>ref.</i>  |                 | <i>ref.</i> |
| 40 - 44            |        | 1.58                | (1.01-2.47)  | 1.59                               | (1.01-2.49)  | 1.50            | (0.95-2.36) |
| 45 - 49            |        | 3.29                | (2.17-5.00)  | 3.20                               | (2.09-4.88)  | 2.79            | (1.83-4.25) |
| 50 and over        |        | 7.33                | (5.03-10.66) | 7.20                               | (4.92-10.54) | 6.02            | (4.12-8.81) |
| Ethnicity          |        |                     |              |                                    |              |                 |             |
| White              |        |                     |              |                                    | <i>ref.</i>  |                 | <i>ref.</i> |
| Non-white          |        |                     |              | 1.49                               | (1.08-2.05)  | 1.42            | (1.02-1.96) |
| Marital status     |        |                     |              |                                    |              |                 |             |
| Married/cohabit    |        |                     |              |                                    | <i>ref.</i>  |                 | <i>ref.</i> |
| Single             |        |                     |              | 1.46                               | (1.10-1.92)  | 1.47            | (1.12-1.95) |
| Divorced/widowed   |        |                     |              | 0.96                               | (0.67-1.39)  | 0.95            | (0.66-1.37) |
| Employment grade   |        |                     |              |                                    |              |                 |             |
| High               |        |                     |              |                                    | <i>ref.</i>  |                 | <i>ref.</i> |
| Intermediate       |        |                     |              | 1.07                               | (0.82-1.40)  | 1.05            | (0.81-1.38) |
| Low                |        |                     |              | 1.50                               | (1.05-2.14)  | 1.47            | (1.03-2.11) |
| Smoking habit      |        |                     |              |                                    |              |                 |             |
| Never-smoker       |        |                     |              |                                    | <i>ref.</i>  |                 | <i>ref.</i> |
| Ex-smoker          |        |                     |              | 1.11                               | (0.87-1.42)  | 1.10            | (0.86-1.41) |
| Current smoker     |        |                     |              | 1.62                               | (1.23-2.14)  | 1.54            | (1.17-2.03) |
| Alcohol drinking   |        |                     |              |                                    |              |                 |             |
| <14 units per week |        |                     |              |                                    | <i>ref.</i>  |                 | <i>ref.</i> |
| ≥14 units per week |        |                     |              | 0.90                               | (0.69-1.16)  | 0.90            | (0.70-1.16) |
| Physical activity  |        |                     |              |                                    |              |                 |             |
| High               |        |                     |              |                                    | <i>ref.</i>  |                 | <i>ref.</i> |
| Intermediate       |        |                     |              | 0.97                               | (0.69-1.36)  | 0.95            | (0.68-1.34) |
| Low                |        |                     |              | 1.34                               | (1.00-1.78)  | 1.31            | (0.98-1.74) |
| SF-36: PCS         |        |                     |              |                                    |              |                 |             |
| Q4 (best)          |        |                     |              |                                    |              |                 | <i>ref.</i> |
| Q3                 |        |                     |              |                                    |              | 1.61            | (1.01-2.35) |
| Q2                 |        |                     |              |                                    |              | 1.42            | (0.97-2.09) |
| Q1 (worst)         |        |                     |              |                                    |              | 2.39            | (1.68-3.40) |
| SF-36: MCS         |        |                     |              |                                    |              |                 |             |
| Q4 (best)          |        |                     |              |                                    |              |                 | <i>ref.</i> |
| Q3                 |        |                     |              |                                    |              | 0.84            | (0.63-1.11) |
| Q2                 |        |                     |              |                                    |              | 0.72            | (0.53-0.96) |
| Q1 (worst)         |        |                     |              |                                    |              | 0.74            | (0.56-0.98) |

**Table S5. SHRs and 95% CIs of non-CVD mortality in three models (Analysis 2)**

|                    | n=8791 | Sex and age |             | <i>Adjusted for</i><br>+ Demography and<br>health behaviours |             | + Health status |             |
|--------------------|--------|-------------|-------------|--------------------------------------------------------------|-------------|-----------------|-------------|
|                    |        | SHR         | 95% CI      | SHR                                                          | 95% CI      | SHR             | 95% CI      |
| Response status    |        |             |             |                                                              |             |                 |             |
| Response           |        | <i>ref.</i> |             | <i>ref.</i>                                                  |             | <i>ref.</i>     |             |
| Withdrawal         |        | 1.75        | (1.46-2.11) | 1.72                                                         | (1.43-2.08) | 1.77            | (1.47-2.13) |
| Non-response       |        | 1.65        | (1.40-1.95) | 1.62                                                         | (1.36-1.92) | 1.59            | (1.34-1.89) |
| Sex                |        |             |             |                                                              |             |                 |             |
| Men                |        | <i>ref.</i> |             | <i>ref.</i>                                                  |             | <i>ref.</i>     |             |
| Women              |        | 0.94        | (0.83-1.07) | 0.95                                                         | (0.81-1.11) | 0.90            | (0.76-1.05) |
| Age in years       |        |             |             |                                                              |             |                 |             |
| 39 and below       |        | <i>ref.</i> |             | <i>ref.</i>                                                  |             | <i>ref.</i>     |             |
| 40 - 44            |        | 1.30        | (1.04-1.63) | 1.30                                                         | (1.04-1.64) | 1.29            | (1.03-1.63) |
| 45 - 49            |        | 2.25        | (1.82-2.79) | 2.33                                                         | (1.88-2.89) | 2.22            | (1.78-2.77) |
| 50 and over        |        | 4.56        | (3.78-5.50) | 4.76                                                         | (3.93-5.77) | 4.45            | (3.65-5.42) |
| Ethnicity          |        |             |             |                                                              |             |                 |             |
| White              |        |             |             | <i>ref.</i>                                                  |             | <i>ref.</i>     |             |
| Non-white          |        |             |             | 0.75                                                         | (0.60-0.94) | 0.69            | (0.55-0.87) |
| Marital status     |        |             |             |                                                              |             |                 |             |
| Married/cohabit    |        |             |             | <i>ref.</i>                                                  |             | <i>ref.</i>     |             |
| Single             |        |             |             | 1.00                                                         | (0.84-1.20) | 0.97            | (0.82-1.16) |
| Divorced/widowed   |        |             |             | 1.05                                                         | (0.86-1.28) | 1.02            | (0.84-1.24) |
| Employment grade   |        |             |             |                                                              |             |                 |             |
| High               |        |             |             | <i>ref.</i>                                                  |             | <i>ref.</i>     |             |
| Intermediate       |        |             |             | 1.02                                                         | (0.88-1.17) | 0.99            | (0.86-1.15) |
| Low                |        |             |             | 0.89                                                         | (0.73-1.09) | 0.83            | (0.68-1.02) |
| Smoking habit      |        |             |             |                                                              |             |                 |             |
| Never-smoker       |        |             |             | <i>ref.</i>                                                  |             | <i>ref.</i>     |             |
| Ex-smoker          |        |             |             | 1.09                                                         | (0.94-1.25) | 1.06            | (0.92-1.22) |
| Current smoker     |        |             |             | 2.04                                                         | (1.75-2.37) | 1.91            | (1.64-2.23) |
| Alcohol drinking   |        |             |             |                                                              |             |                 |             |
| <14 units per week |        |             |             | <i>ref.</i>                                                  |             | <i>ref.</i>     |             |
| ≥14 units per week |        |             |             | 1.10                                                         | (0.96-1.26) | 1.10            | (0.96-1.26) |
| Physical activity  |        |             |             |                                                              |             |                 |             |
| High               |        |             |             | <i>ref.</i>                                                  |             | <i>ref.</i>     |             |
| Intermediate       |        |             |             | 0.81                                                         | (0.68-0.97) | 0.80            | (0.67-0.96) |
| Low                |        |             |             | 0.96                                                         | (0.83-1.12) | 0.92            | (0.79-1.07) |
| SF-36: PCS         |        |             |             |                                                              |             |                 |             |
| Q4 (best)          |        |             |             |                                                              |             | <i>ref.</i>     |             |
| Q3                 |        |             |             |                                                              |             | 1.20            | (0.97-1.49) |
| Q2                 |        |             |             |                                                              |             | 1.42            | (1.16-1.74) |
| Q1 (worst)         |        |             |             |                                                              |             | 2.04            | (1.69-2.46) |
| SF-36: MCS         |        |             |             |                                                              |             |                 |             |
| Q4 (best)          |        |             |             |                                                              |             | <i>ref.</i>     |             |
| Q3                 |        |             |             |                                                              |             | 1.01            | (0.85-1.20) |
| Q2                 |        |             |             |                                                              |             | 1.18            | (0.99-1.39) |
| Q1 (worst)         |        |             |             |                                                              |             | 1.32            | (1.12-1.56) |
